# Supplementary material for: Jasmonate-Elicited Stress Induces Metabolic Change in the Leaves of Leucaena leucocephala
Source: MDPI journal article supplement (doi:10.3390/molecules23020188), 2018-01-24
Supplement: s1 [file s1]

Figure S1. The growing plants of *L. leucocephala* in our research.

Figure S2. The chemical structures of nineteen identified metabolites. The notations of 1-19 were corresponding to different metabolites as listed in Table 1.

Figure S3. The  $^1\text{H}$  and  $^{13}\text{C}$  NMR spectra of mimosine (14), quercetin (15), and quercetin-3-*O*- $\alpha$ -rhamnoside (16).

Figure S4. The summary of fits of PLS-DA models of JA, MeJA, CGM and control, respectively, when two components were calculated.

Figure S5. The permutations plots of JA, MeJA, JA-Ile and CGM treatments were performed, respectively, in order to validate PLS-DA model, with 200 permutations and two components calculated.

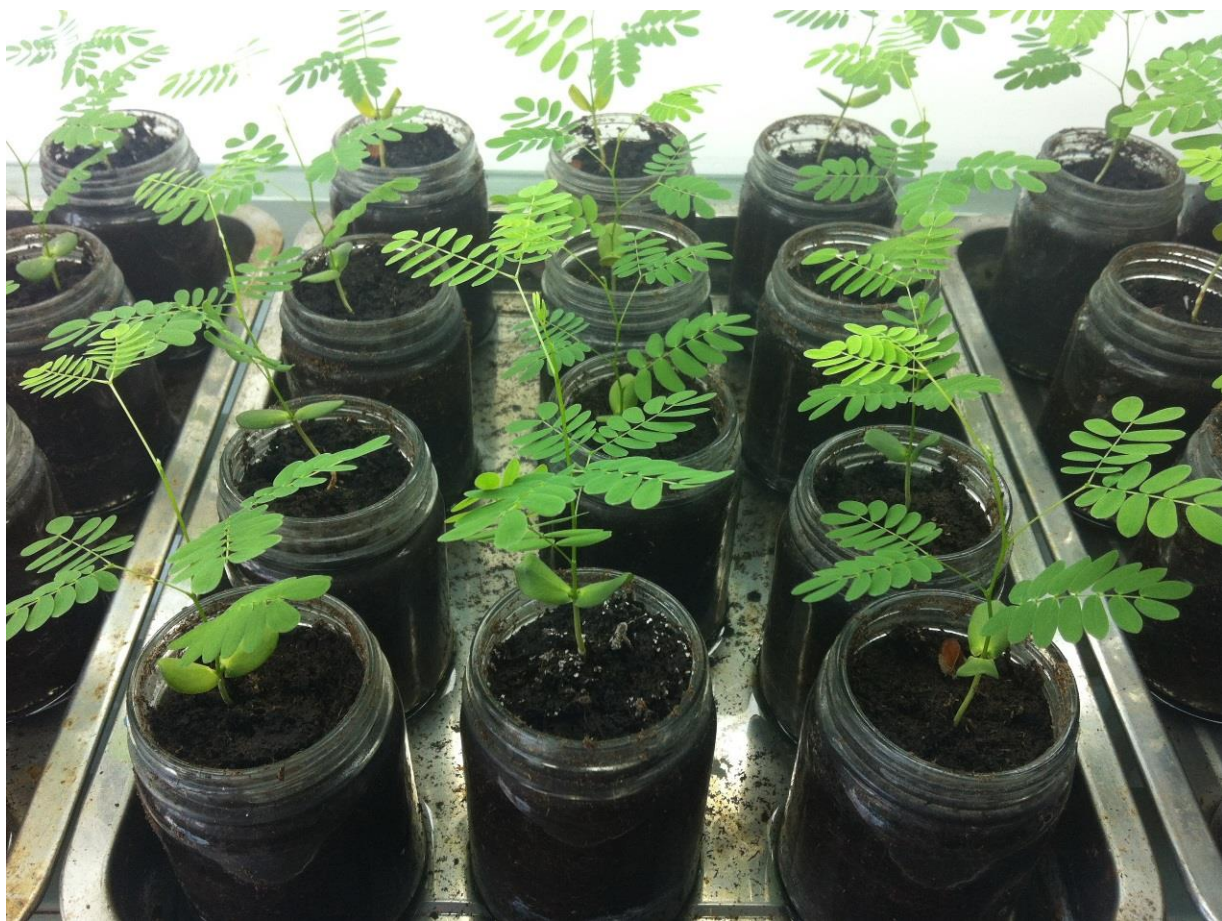

**Figure S1**

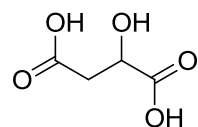

1

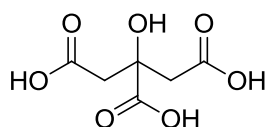

2

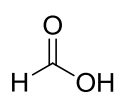

3

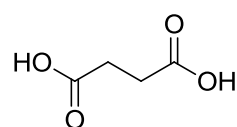

4

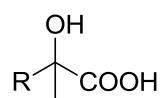

5

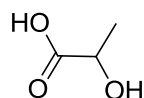

6

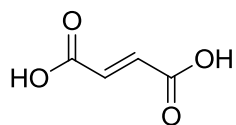

7

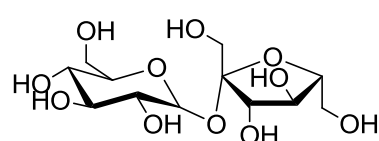

8

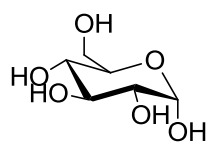

9

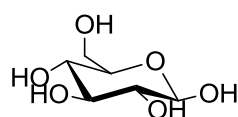

10

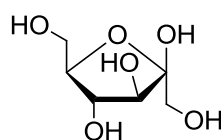

11

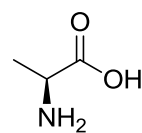

12

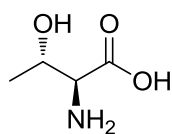

13

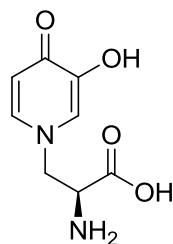

14

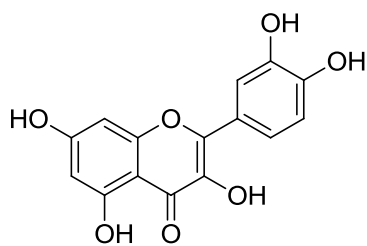

15

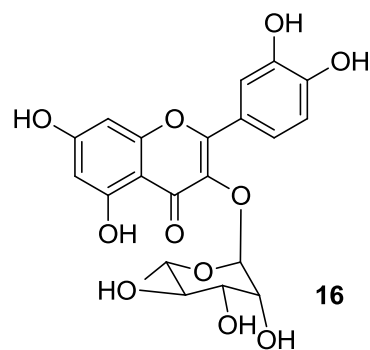

16

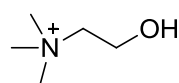

17

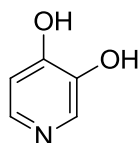

19

Figure S2

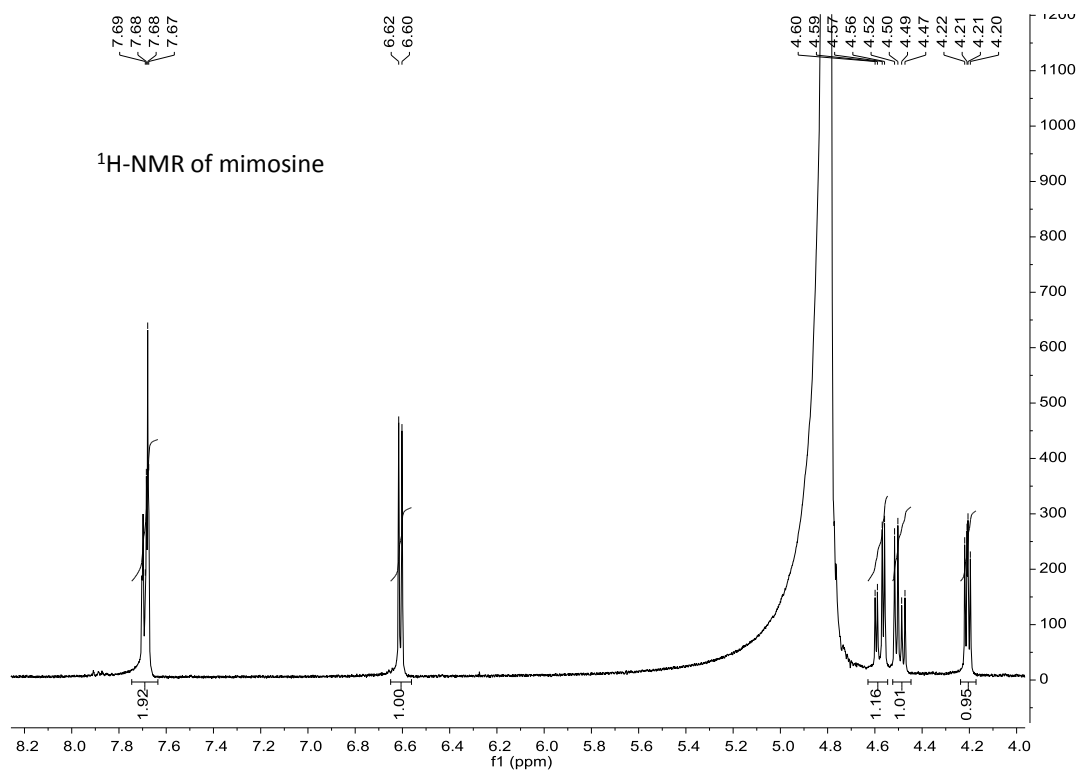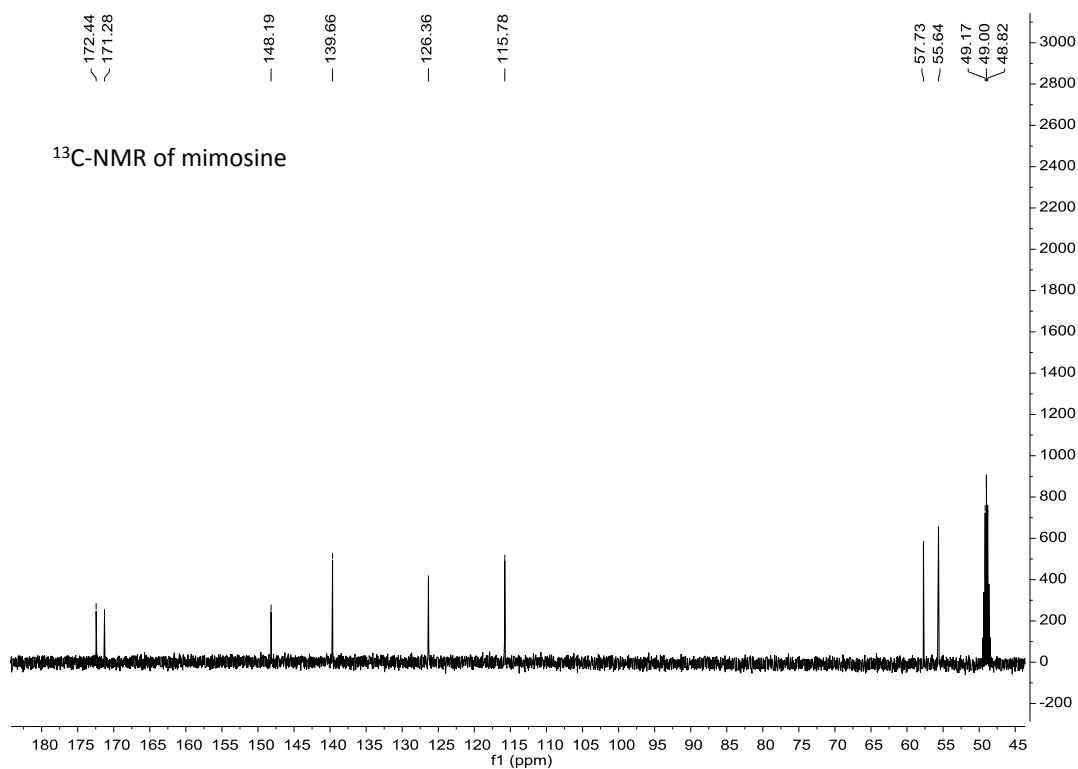

Figure S3

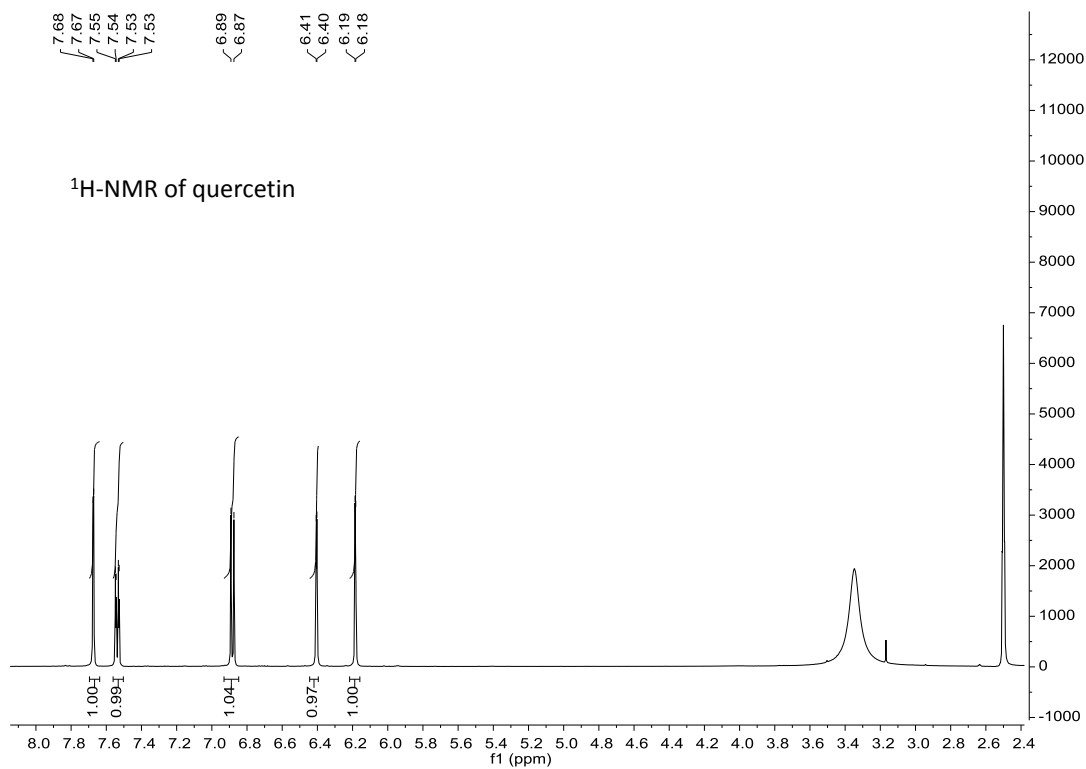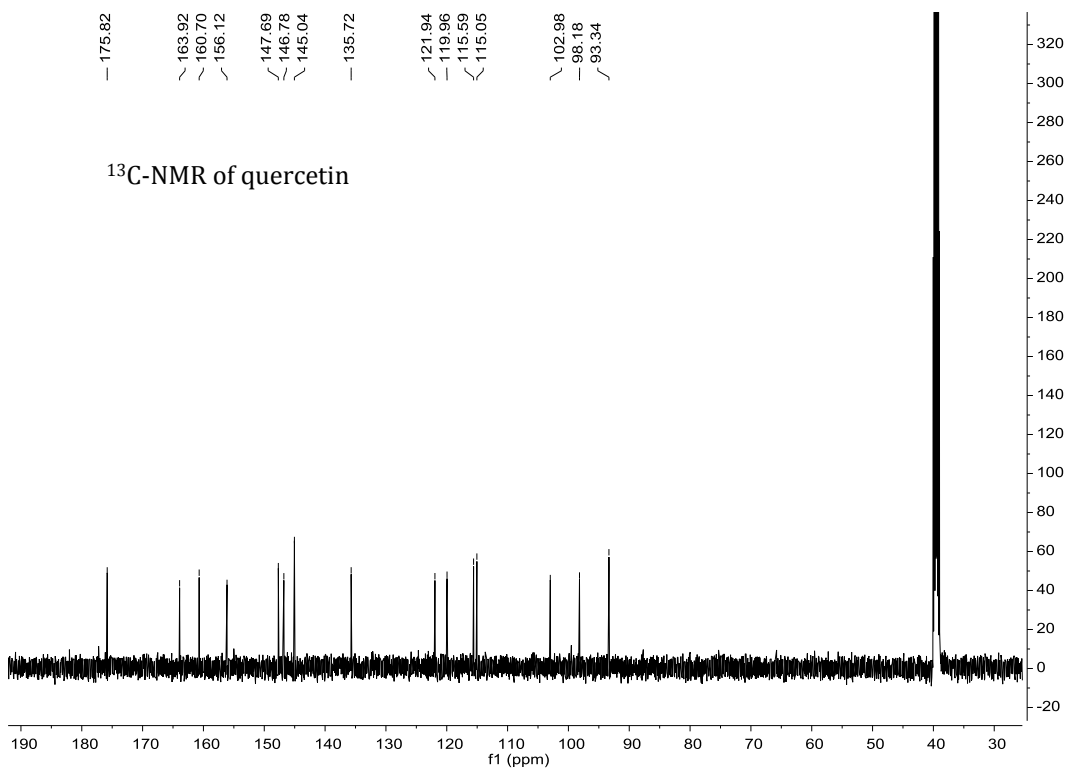

Figure S3

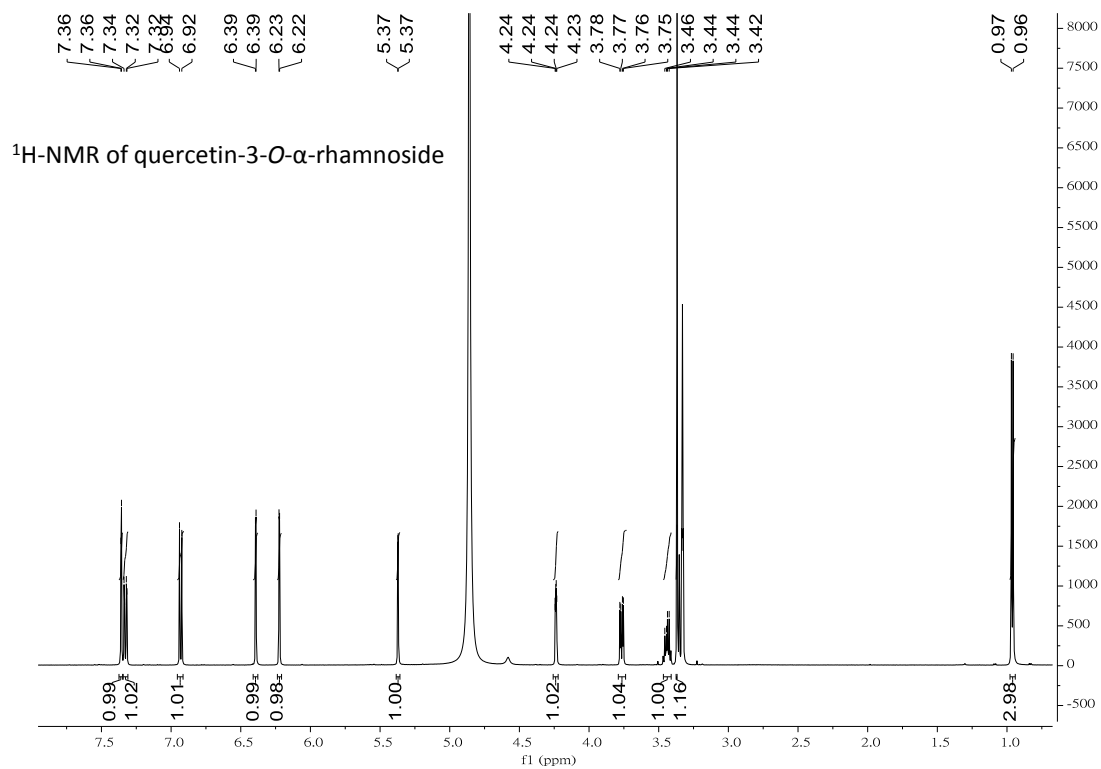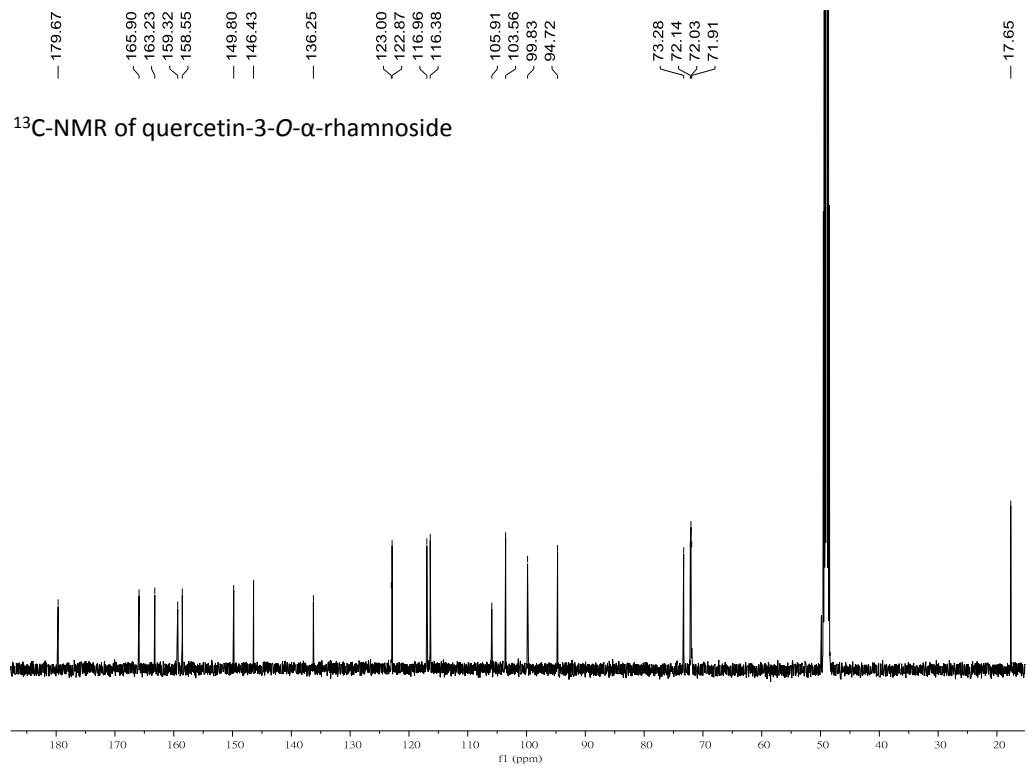

Figure S3

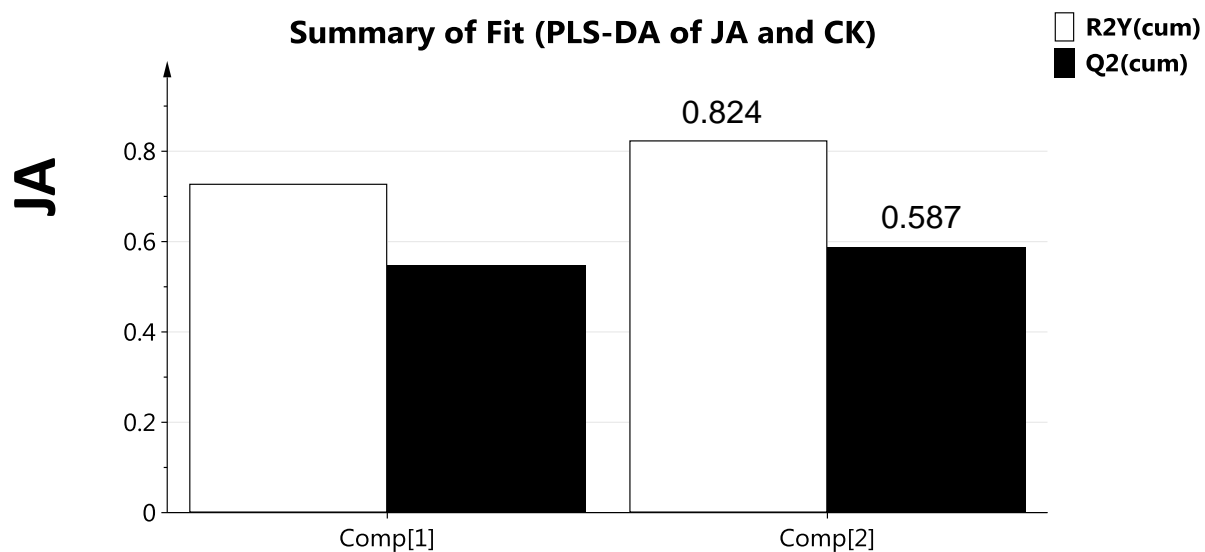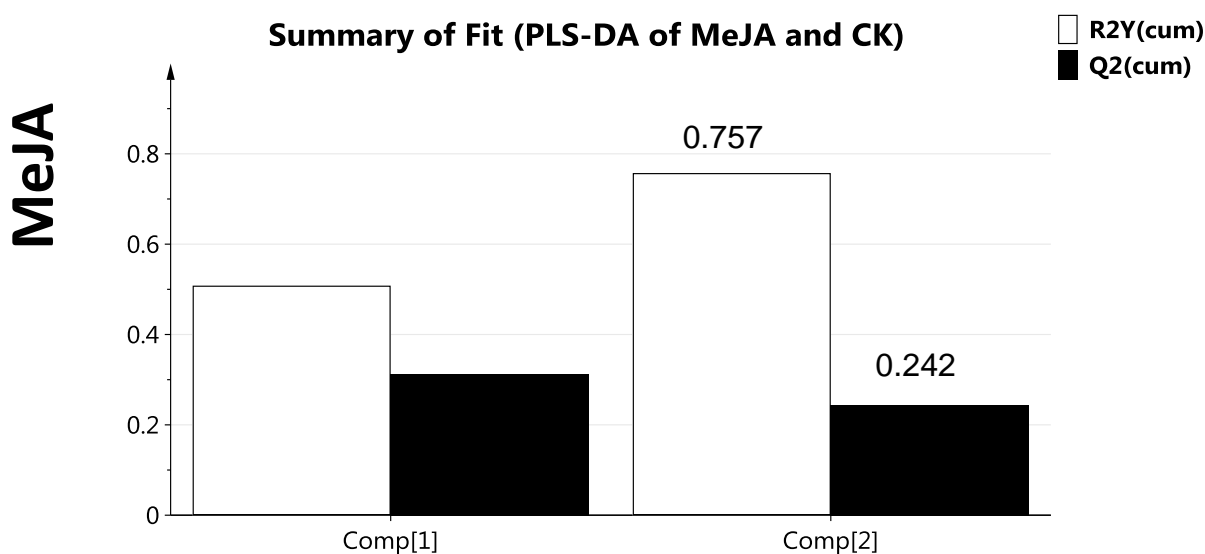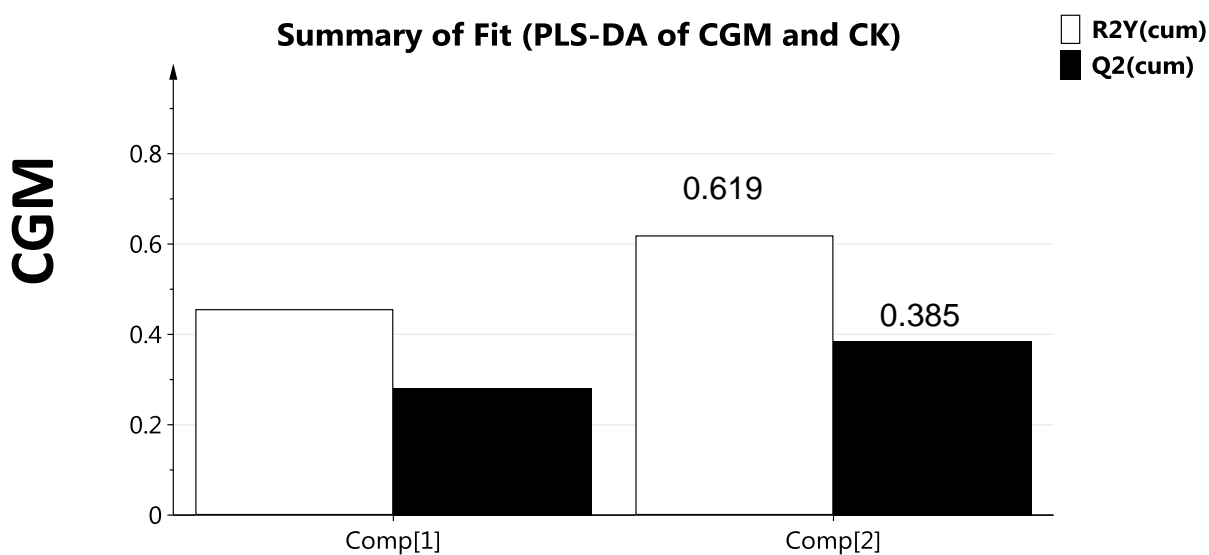

**Figure S4**

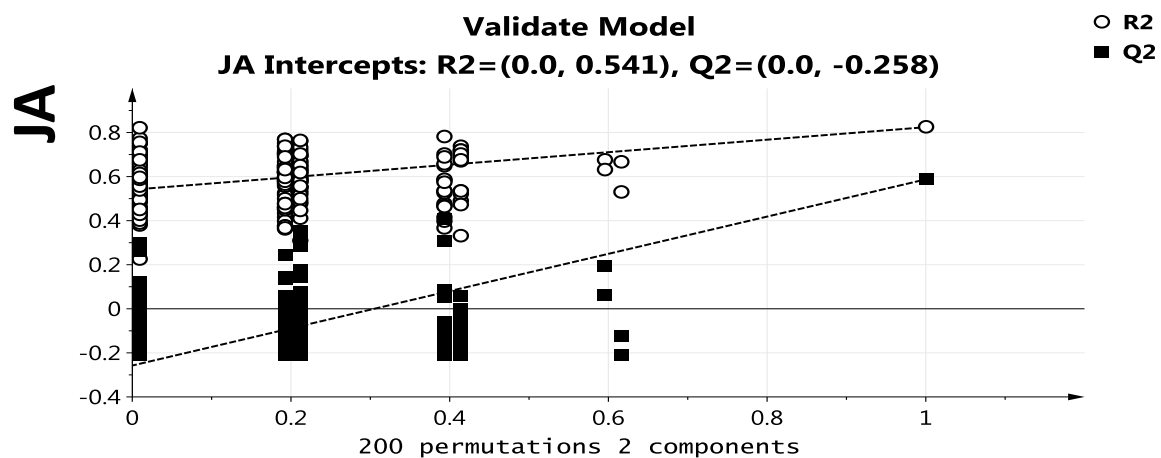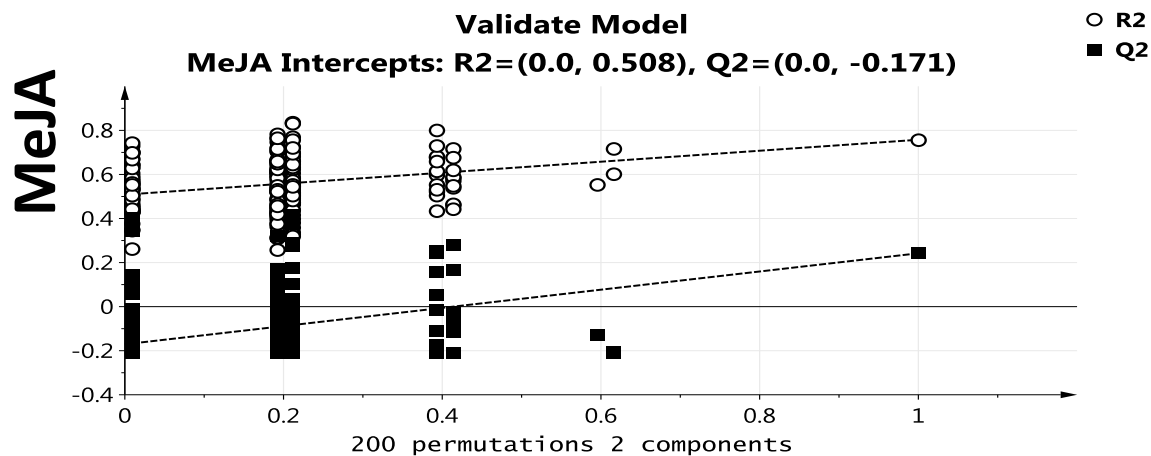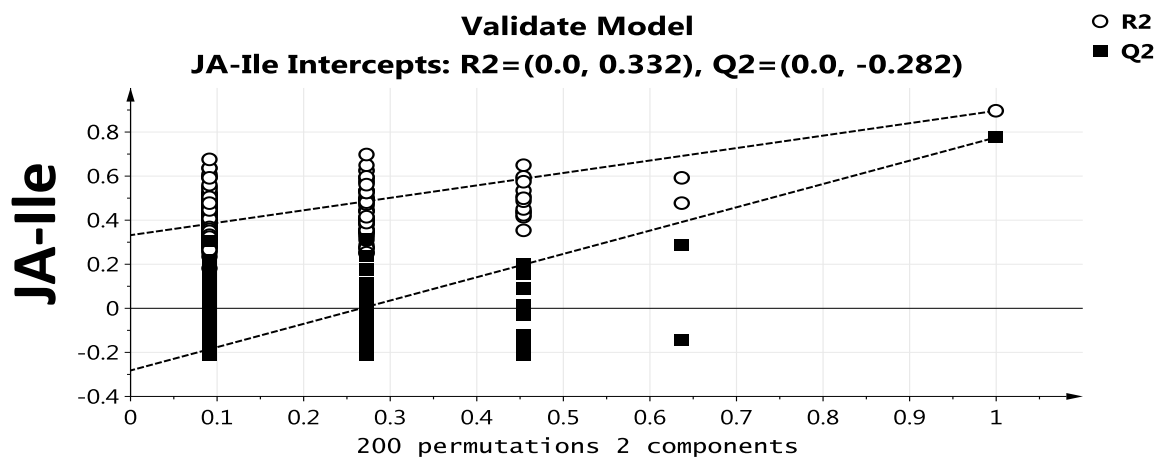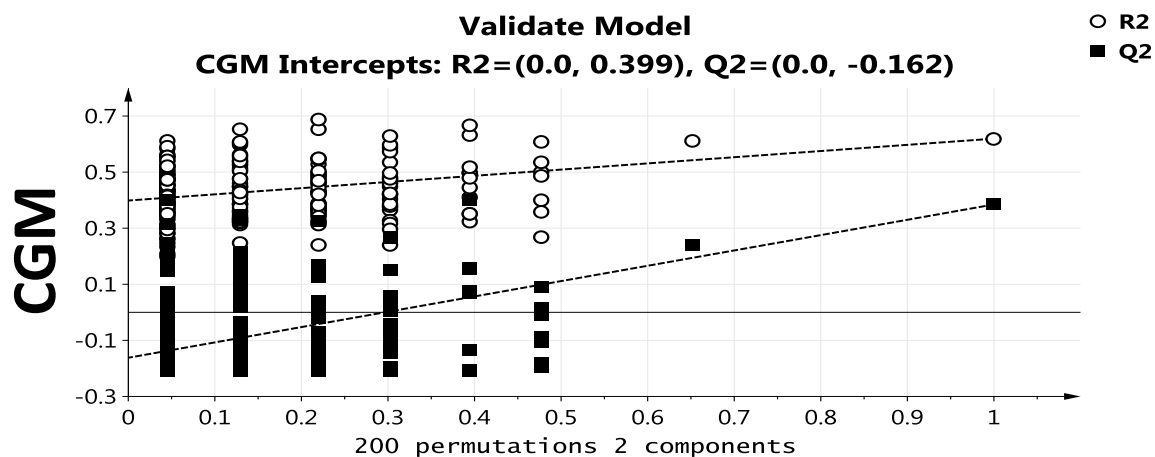

Figure S5
